# Supplementary material
Source: MDPI journal article supplement (https://www.mdpi.com/2075-4442/11/3/112)

# Anton Paar Tribological Cell (Ball On Three Plates)

| Parameter               |                     | Ball                 | Plates               |
|-------------------------|---------------------|----------------------|----------------------|
| Steel                   |                     | 100Cr6               | X5CrNi18-10          |
| $R_a$                   | [nm]                | 30                   | 30                   |
| Modulus of Elasticity E | [N/m <sup>2</sup> ] | $2.1 \times 10^{11}$ | $1.8 \times 10^{11}$ |
| Poisson's ratio $\nu$   |                     | 0.3                  | 0.24                 |
| Effective Radius R      | [m]                 | 0.00635              | -                    |

$$E' = \frac{2}{\left(\frac{1 - \nu_A^2}{E_A} + \frac{1 - \nu_B^2}{E_B}\right)}$$

| Parameter                               |                     |                |                                                |
|-----------------------------------------|---------------------|----------------|------------------------------------------------|
| Pressure-viscosity coefficient $\alpha$ | [1/Pa]              | VG 46<br>VG220 | $1.65 \times 10^{-9}$<br>$1.88 \times 10^{-9}$ |
| Effective Modulus of Elasticity $E'$    | [N/m <sup>2</sup> ] |                | $2.1 \times 10^{11}$                           |
| Ellipticity parameter $k$               | [-]                 |                | 1                                              |
| Entrainment speed $u_E$                 | [m/s]               |                | 0,7                                            |
| Load $F_N$                              | [N]                 |                | 4.714                                          |
| Infinite dynamic viscosity $\eta$       | [Pa s]              |                |                                                |

$$h_{min} = 3.63 \cdot U^{0.68} \cdot G^{0.49} \cdot R \cdot W^{-0.073} (1 - e^{-0.68k})$$

$$U = \frac{\eta u_E}{E' R}$$

$$G = \alpha E'$$

$$W = \frac{F_N}{E' R^2}$$

$$\lambda = \frac{h_{min}}{\sqrt{R_{a,1}^2 + R_{a,2}^2}}$$

# Mini Traction Machine (Ball On Disc)

| Parameter               |                     | Ball                   | Disc                   |
|-------------------------|---------------------|------------------------|------------------------|
| Steel                   |                     | 100Cr6                 | 100Cr6                 |
| R <sub>a</sub>          | [nm]                | 20                     | 20                     |
| Modulus of Elasticity E | [N/m <sup>2</sup> ] | 2.1 x 10 <sup>11</sup> | 2.1 x 10 <sup>11</sup> |
| Poisson's ratio $\nu$   |                     | 0.3                    | 0.3                    |
| Effective Radius R      | [m]                 | 0.0095                 | -                      |

$$E' = \frac{2}{\left(\frac{1-\nu_A^2}{E_A} + \frac{1-\nu_B^2}{E_B}\right)}$$

$$\frac{1}{R_x} = \frac{1}{r_{x,A}} + \frac{1}{r_{x,B}} \quad \frac{1}{R_y} = \frac{1}{r_{y,A}} + \frac{1}{r_{y,B}} \quad \frac{1}{R} = \frac{1}{R_x} + \frac{1}{R_y}$$

| Parameter                               |                     |       |                         |
|-----------------------------------------|---------------------|-------|-------------------------|
| Pressure-viscosity coefficient $\alpha$ | [1/Pa]              | VG 46 | 1.65 x 10 <sup>-9</sup> |
|                                         |                     | VG220 | 1.88 x 10 <sup>-9</sup> |
| Effective Modulus of Elasticity $E'$    | [N/m <sup>2</sup> ] |       | 2.33 x 10 <sup>11</sup> |
| Ellipticity parameter $k$               | [-]                 |       | 1                       |
| Entrainment speed $u_E$                 | [m/s]               |       | 3.5                     |
| Load $F_N$                              | [N]                 |       | 4.714                   |
| Infinite dynamic viscosity $\eta$       | [Pa s]              |       |                         |

$$h_{min} = 3.63 \cdot U^{0.68} \cdot G^{0.49} \cdot R \cdot W^{-0.073} (1 - e^{-0.68k})$$

$$U = \frac{\eta u_E}{E' R}$$

$$G = \alpha E'$$

$$W = \frac{F_N}{E' R^2}$$

$$\lambda = \frac{h_{min}}{\sqrt{R_{a,1}^2 + R_{a,2}^2}}$$

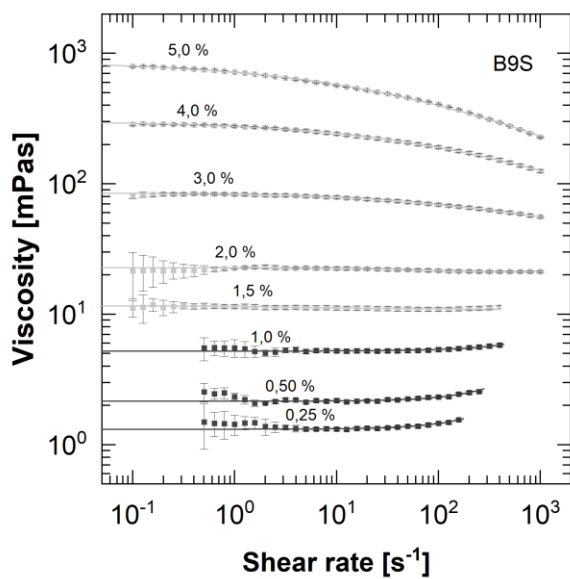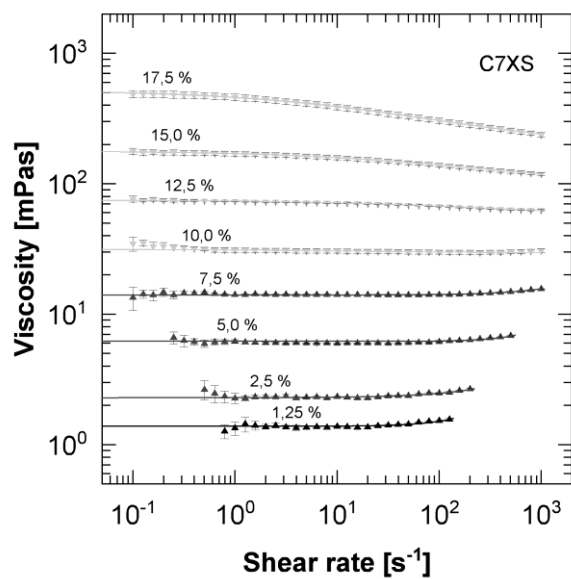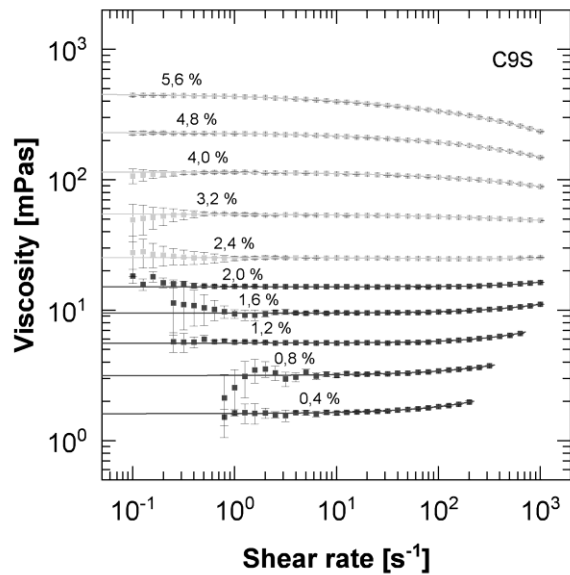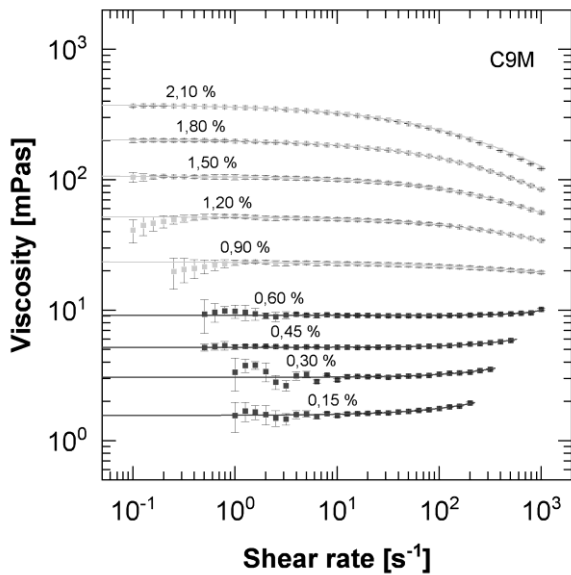

Supplement: s1 [file s1]
